# Supplementary material
Source: Springer Nature journal article supplement (https://www.springermedizin.de/resource/supplementary/11689_2014_107_MOESM4_ESM.pdf/9673230)

**P150 to standards (uV)**

**Frontal ROI**

**HRA**

**LRC**

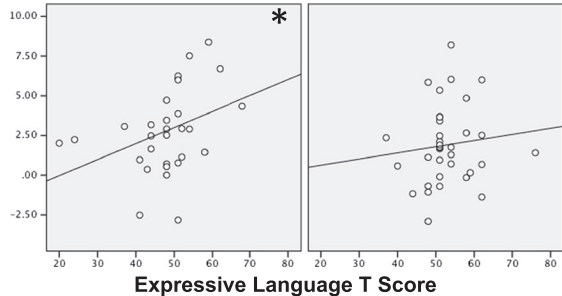

**Central ROI**

**HRA**

**LRC**

**P150 to standards (uV)**

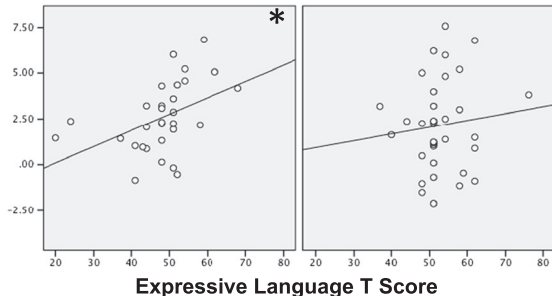

Supplement: MOESM4 [file 9673230]
